# Supplementary material for: An imidazole-based covalent-organic framework enabling a super-efficiency in sunlight-driven uranium extraction from seawater
Source: Royal Society of Chemistry journal article supplement (doi:10.1039/d4sc02554g), 2024-01-01
Supplement: d4sc02554g1.pdf [file d4sc02554g1.pdf]

## **An imidazole-based covalent-organic framework enabling a super-efficiency in sunlight-driving uranium extraction from seawater**

Lizhen Zhong,<sup>a</sup> Xuefeng Feng,<sup>a\*</sup> Qingyun Zhang,<sup>a</sup> Xianqing Xie<sup>b</sup> and Feng Luo<sup>a\*</sup>

<sup>a</sup>School of Chemistry and Materials Science, East China University of Technology, Nanchang 330013, China

<sup>b</sup>National Engineering Research Center for Carbohydrate Synthesis, Jiangxi Normal University, Nanchang, 330027, China

E-mail: fxfeng@ecut.edu.cn and ecitluofeng@163.com

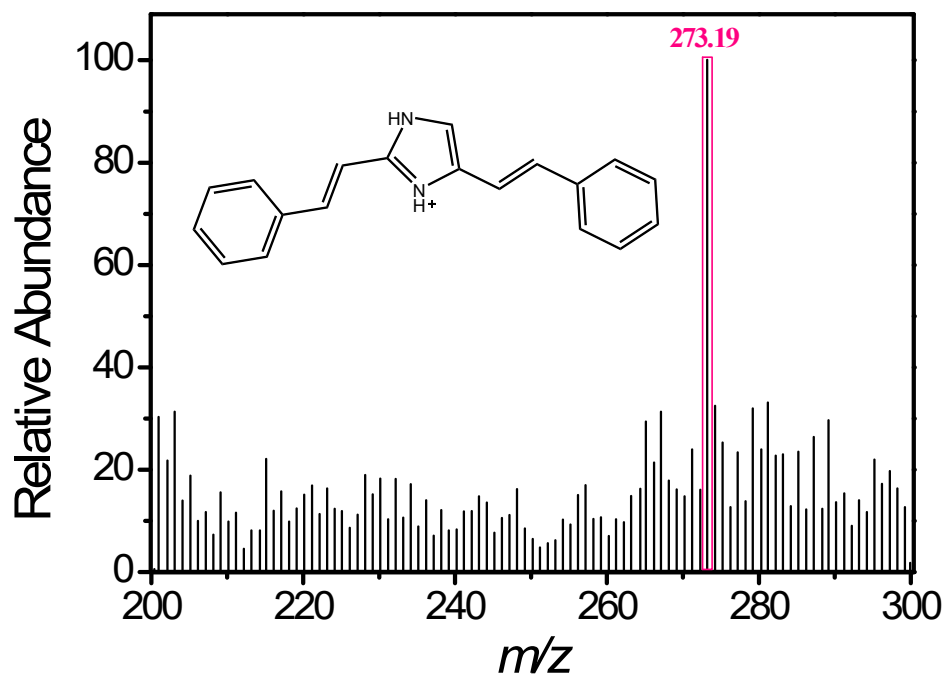

**Fig. S1** MS of model compound.

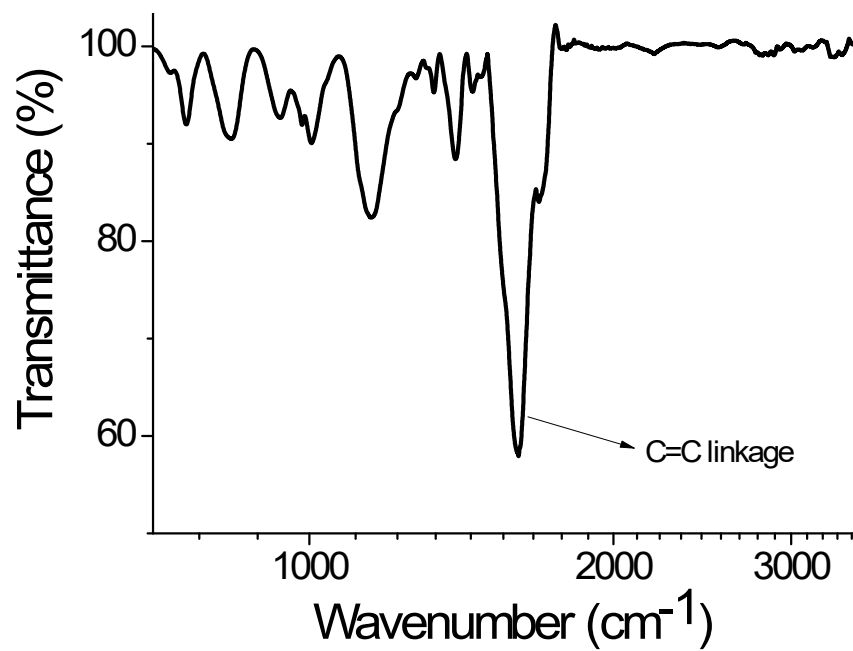

**Fig. S2** IR of BI-COF.

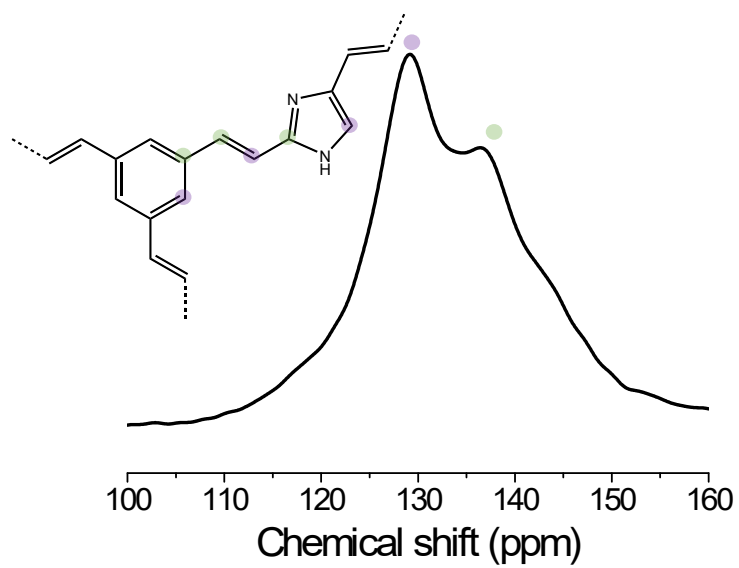

**Fig. S3** CP-MAS  $^{13}\text{C}$  NMR of BI-COF.

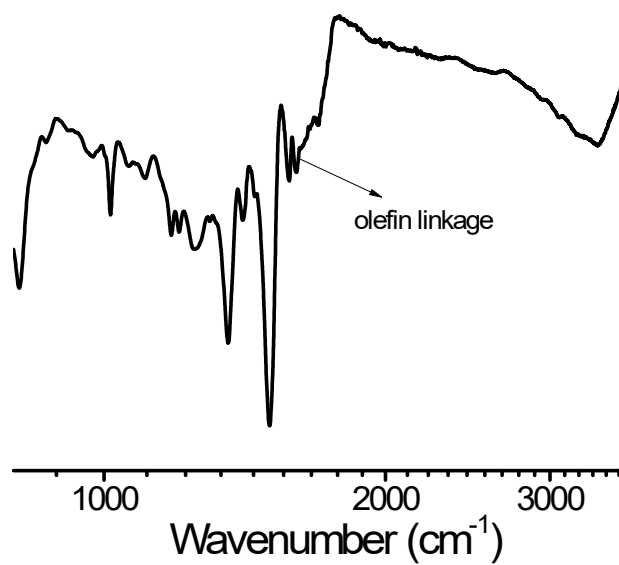

**Fig. S4** IR of TI-COF.

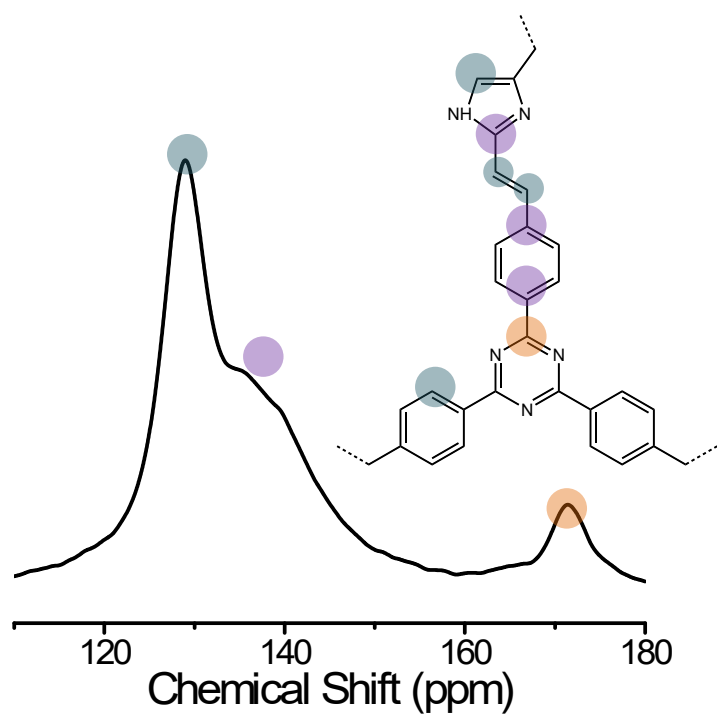

**Fig. S5** CP-MAS <sup>13</sup>C NMR of TI-COF.

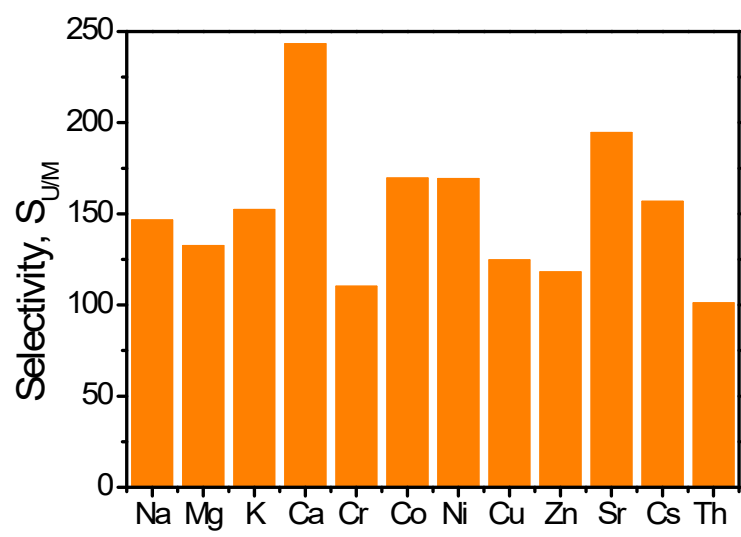

**Fig. S6** Selectivity of  $S_{UM}$ .

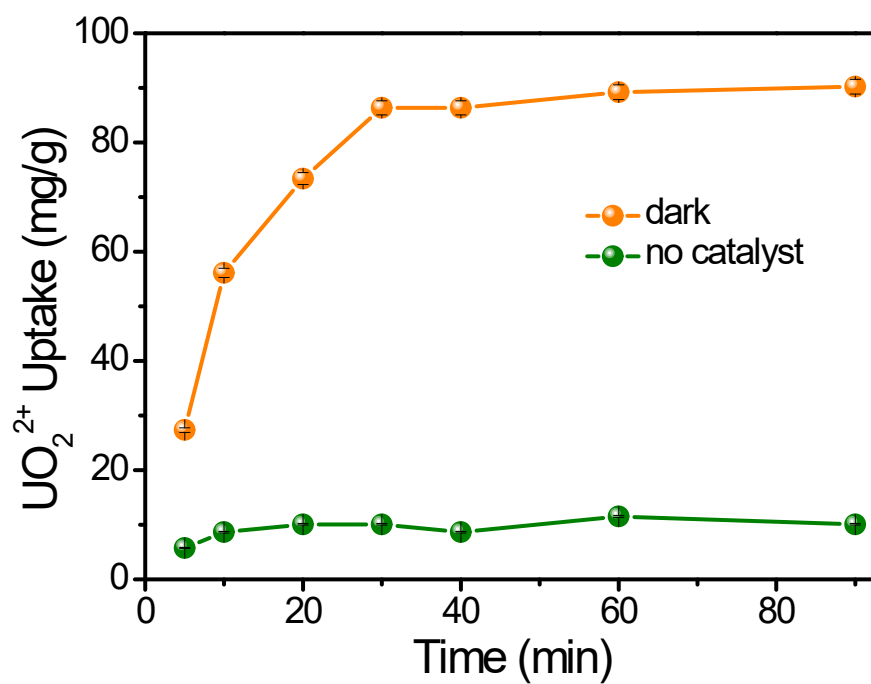

**Fig. S7** Uranium adsorption under controlled conditions upon TI-COF. The error bars is based on the average vaule of three times.



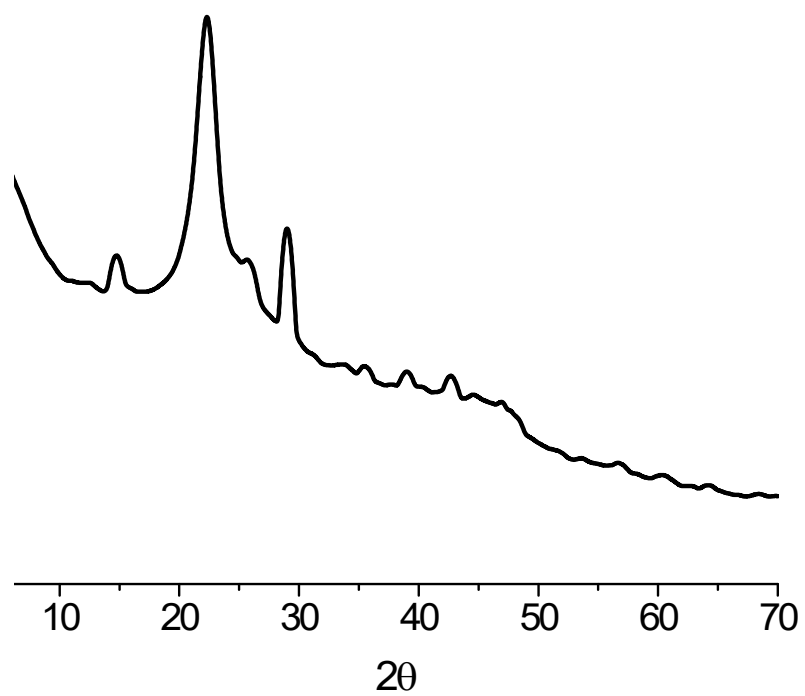

**Fig. S8** The PXRD patterns of the uranium-extracted samples after photocatalysis.

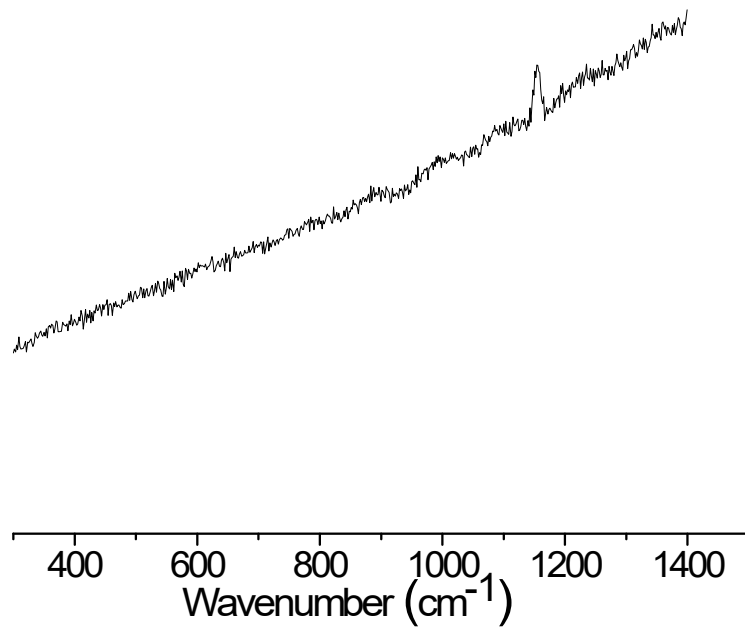

**Fig. S9** The Raman spectra of the uranium-extracted samples after photocatalysis.

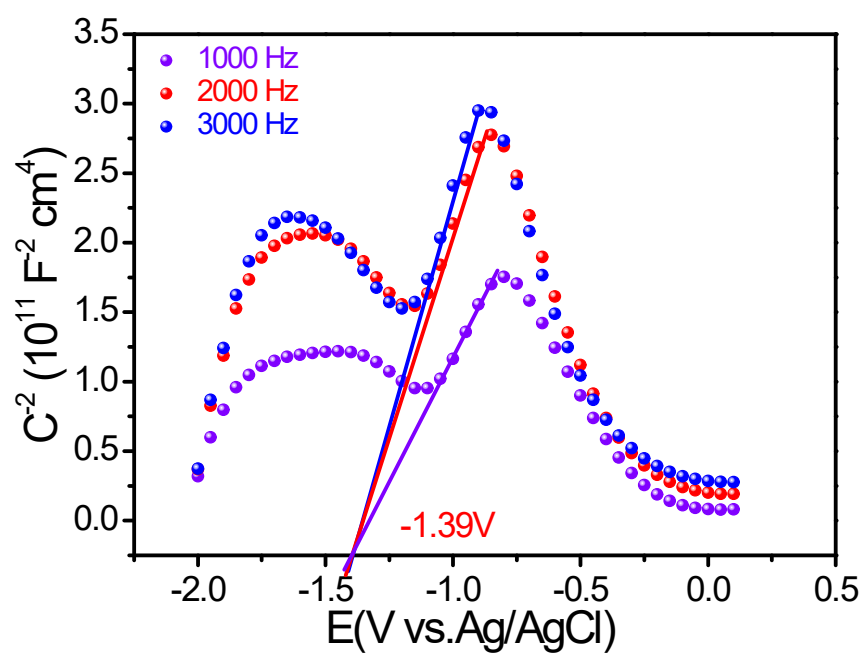

**Fig. S10** Mott-Schottky plots of BI-COF.

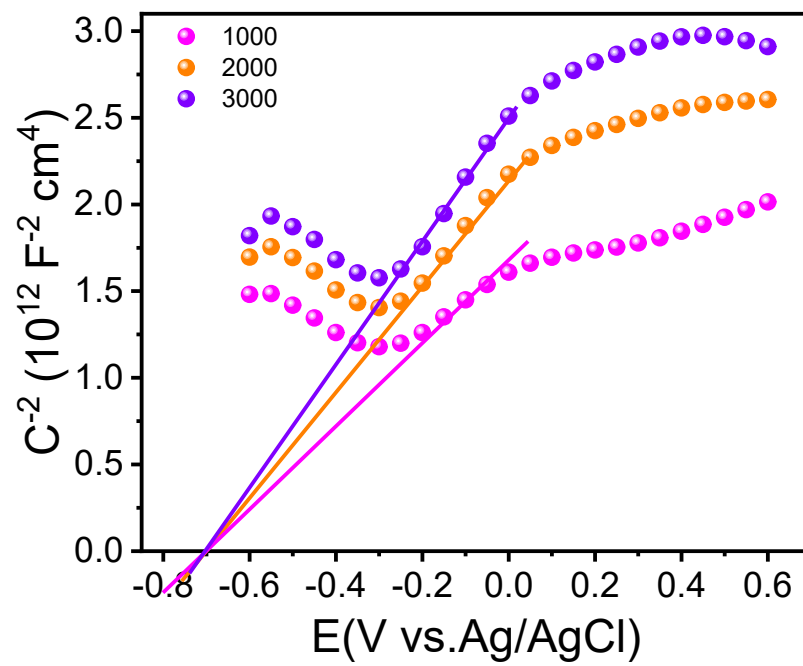

**Fig. S11** Mott-Schottky plots of TI-COF.

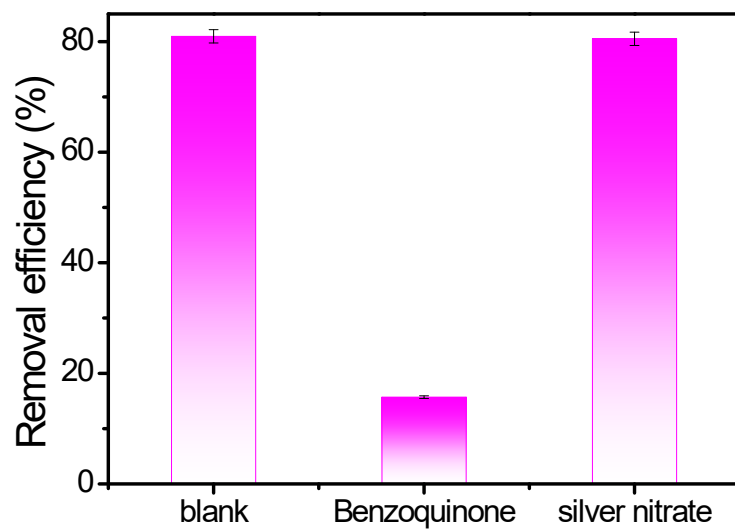

**Fig. S12** The active intermediate test. The error bars is based on the average vaule of three times.

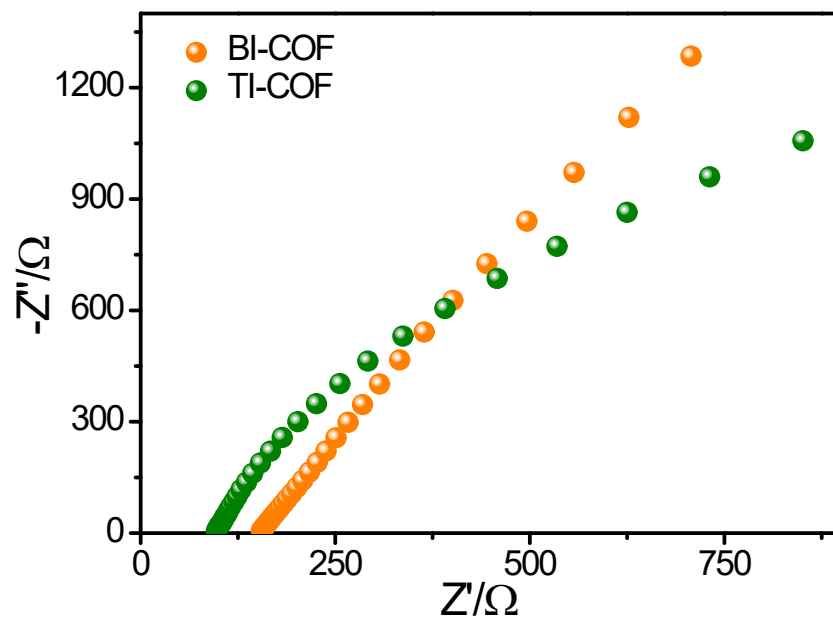

Fig. S13 Impedance plots of TI-COF and BI-COF.

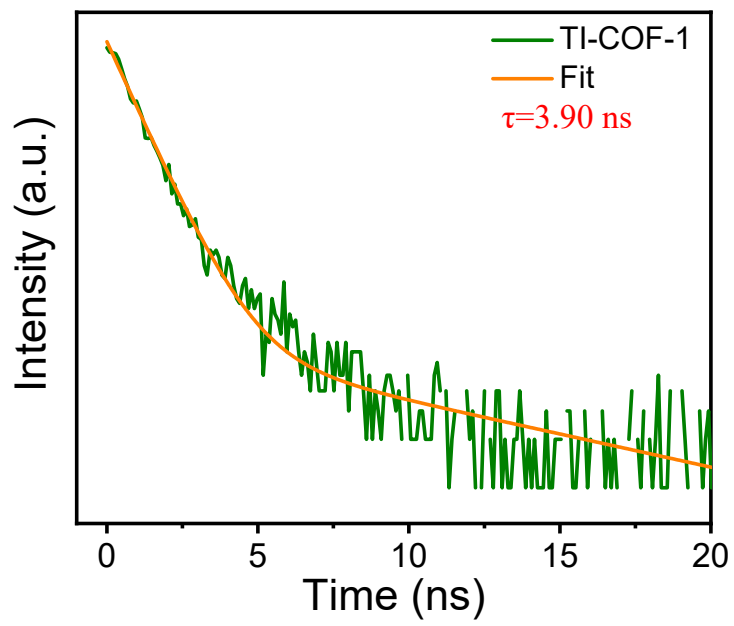

**Fig. S14** Fluorescence lifetimes of TI-COF.

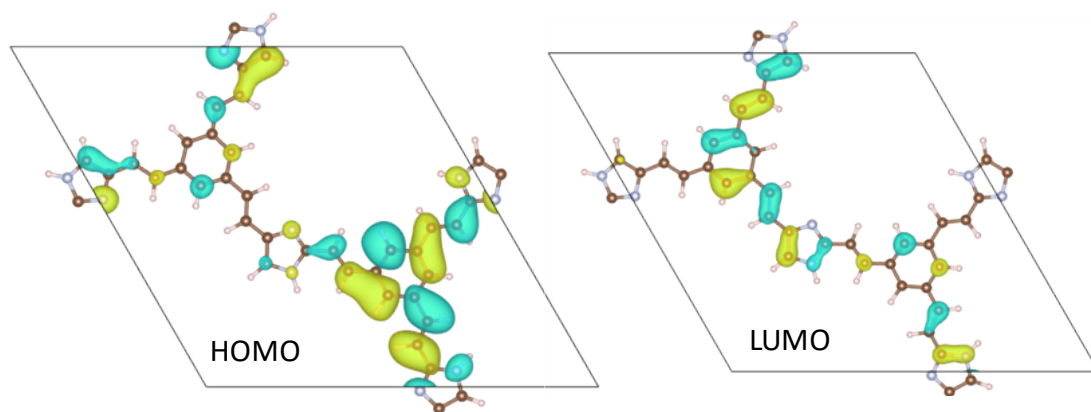

**Fig. S15** View of the HOMO and LUMO levels of BI-COF.



**Fig. S16** View of the HOMO and LUMO levels of BI-COF and TI-COF, and their photocatalytic mechanism.

**Table S1.** Structural data of BI-COF.

|                                |   |                    |         |         |         |      |      |
|--------------------------------|---|--------------------|---------|---------|---------|------|------|
| data_ BI-COF                   |   |                    |         |         |         |      |      |
| _audit_creation_date           |   | 2023-10-15         |         |         |         |      |      |
| _audit_creation_method         |   | 'Materials Studio' |         |         |         |      |      |
| _symmetry_space_group_name_H-M |   | 'P-6'              |         |         |         |      |      |
| _symmetry_Int_Tables_number    |   | 174                |         |         |         |      |      |
| _symmetry_cell_setting         |   | hexagonal          |         |         |         |      |      |
| loop_                          |   |                    |         |         |         |      |      |
| _symmetry_equiv_pos_as_xyz     |   |                    |         |         |         |      |      |
| x,y,z                          |   |                    |         |         |         |      |      |
| -y,x-y,z                       |   |                    |         |         |         |      |      |
| -x+y,-x,z                      |   |                    |         |         |         |      |      |
| x,y,-z                         |   |                    |         |         |         |      |      |
| -y,x-y,-z                      |   |                    |         |         |         |      |      |
| -x+y,-x,-z                     |   |                    |         |         |         |      |      |
| _cell_length_a                 |   | 20.8009            |         |         |         |      |      |
| _cell_length_b                 |   | 20.8009            |         |         |         |      |      |
| _cell_length_c                 |   | 3.4407             |         |         |         |      |      |
| _cell_angle_alpha              |   | 90.0000            |         |         |         |      |      |
| _cell_angle_beta               |   | 90.0000            |         |         |         |      |      |
| _cell_angle_gamma              |   | 120.0000           |         |         |         |      |      |
| loop_                          |   |                    |         |         |         |      |      |
| _atom_site_label               |   |                    |         |         |         |      |      |
| _atom_site_type_symbol         |   |                    |         |         |         |      |      |
| _atom_site_fract_x             |   |                    |         |         |         |      |      |
| _atom_site_fract_y             |   |                    |         |         |         |      |      |
| _atom_site_fract_z             |   |                    |         |         |         |      |      |
| _atom_site_U_iso_or_equiv      |   |                    |         |         |         |      |      |
| _atom_site_adp_type            |   |                    |         |         |         |      |      |
| _atom_site_occupancy           |   |                    |         |         |         |      |      |
| C1                             | C | 0.45313            | 0.39945 | 0.50000 | 0.00000 | Uiso | 1.00 |
| N2                             | N | 0.44952            | 0.46247 | 0.50000 | 0.00000 | Uiso | 1.00 |
| C3                             | C | 0.37609            | 0.43837 | 0.50000 | 0.00000 | Uiso | 1.00 |
| C4                             | C | 0.33671            | 0.36202 | 0.50000 | 0.00000 | Uiso | 1.00 |
| N5                             | N | 0.38541            | 0.33760 | 0.50000 | 0.00000 | Uiso | 1.00 |
| C6                             | C | 0.52474            | 0.40080 | 0.50000 | 0.00000 | Uiso | 1.00 |
| C7                             | C | 0.34332            | 0.48678 | 0.50000 | 0.00000 | Uiso | 1.00 |
| C8                             | C | 0.53010            | 0.33915 | 0.50000 | 0.00000 | Uiso | 1.00 |
| C9                             | C | 0.40908            | 0.69007 | 0.50000 | 0.00000 | Uiso | 1.00 |
| C10                            | C | 0.38618            | 0.74332 | 0.50000 | 0.00000 | Uiso | 1.00 |
| C11                            | C | 0.38572            | 0.56095 | 0.50000 | 0.00000 | Uiso | 1.00 |
| C12                            | C | 0.73134            | 0.32859 | 0.50000 | 0.00000 | Uiso | 1.00 |
| C13                            | C | 0.73686            | 0.39886 | 0.50000 | 0.00000 | Uiso | 1.00 |
| H14                            | H | 0.27697            | 0.32671 | 0.50000 | 0.00000 | Uiso | 1.00 |

|     |   |         |         |         |         |      |      |
|-----|---|---------|---------|---------|---------|------|------|
| H15 | H | 0.37204 | 0.28213 | 0.50000 | 0.00000 | Uiso | 1.00 |
| H16 | H | 0.57359 | 0.45514 | 0.50000 | 0.00000 | Uiso | 1.00 |
| H17 | H | 0.28355 | 0.45969 | 0.50000 | 0.00000 | Uiso | 1.00 |
| H18 | H | 0.47968 | 0.28579 | 0.50000 | 0.00000 | Uiso | 1.00 |
| H19 | H | 0.46725 | 0.70685 | 0.50000 | 0.00000 | Uiso | 1.00 |
| H20 | H | 0.44548 | 0.58476 | 0.50000 | 0.00000 | Uiso | 1.00 |
| H21 | H | 0.78047 | 0.32352 | 0.50000 | 0.00000 | Uiso | 1.00 |

**Table S2.** Structural data of TI-COF.

|                                |   |                    |         |          |         |      |      |
|--------------------------------|---|--------------------|---------|----------|---------|------|------|
| data_ TI-COF                   |   |                    |         |          |         |      |      |
| _audit_creation_date           |   | 2023-10-15         |         |          |         |      |      |
| _audit_creation_method         |   | 'Materials Studio' |         |          |         |      |      |
| _symmetry_space_group_name_H-M |   | 'P-6'              |         |          |         |      |      |
| _symmetry_Int_Tables_number    |   | 174                |         |          |         |      |      |
| _symmetry_cell_setting         |   | hexagonal          |         |          |         |      |      |
| loop_                          |   |                    |         |          |         |      |      |
| _symmetry_equiv_pos_as_xyz     |   |                    |         |          |         |      |      |
| x,y,z                          |   |                    |         |          |         |      |      |
| -y,x-y,z                       |   |                    |         |          |         |      |      |
| -x+y,-x,z                      |   |                    |         |          |         |      |      |
| x,y,-z                         |   |                    |         |          |         |      |      |
| -y,x-y,-z                      |   |                    |         |          |         |      |      |
| -x+y,-x,-z                     |   |                    |         |          |         |      |      |
| _cell_length_a                 |   | 34.0869            |         |          |         |      |      |
| _cell_length_b                 |   | 34.0869            |         |          |         |      |      |
| _cell_length_c                 |   | 6.6018             |         |          |         |      |      |
| _cell_angle_alpha              |   | 90.0000            |         |          |         |      |      |
| _cell_angle_beta               |   | 90.0000            |         |          |         |      |      |
| _cell_angle_gamma              |   | 120.0000           |         |          |         |      |      |
| loop_                          |   |                    |         |          |         |      |      |
| _atom_site_label               |   |                    |         |          |         |      |      |
| _atom_site_type_symbol         |   |                    |         |          |         |      |      |
| _atom_site_fract_x             |   |                    |         |          |         |      |      |
| _atom_site_fract_y             |   |                    |         |          |         |      |      |
| _atom_site_fract_z             |   |                    |         |          |         |      |      |
| _atom_site_U_iso_or_equiv      |   |                    |         |          |         |      |      |
| _atom_site_adp_type            |   |                    |         |          |         |      |      |
| _atom_site_occupancy           |   |                    |         |          |         |      |      |
| C1                             | C | 0.41654            | 0.38254 | -0.00000 | 0.00000 | Uiso | 1.00 |
| N2                             | N | 0.41642            | 0.42199 | -0.00000 | 0.00000 | Uiso | 1.00 |
| C3                             | C | 0.37221            | 0.40958 | -0.00000 | 0.00000 | Uiso | 1.00 |
| C4                             | C | 0.34625            | 0.36298 | -0.00000 | 0.00000 | Uiso | 1.00 |

|     |   |         |         |          |         |      |      |
|-----|---|---------|---------|----------|---------|------|------|
| N5  | N | 0.37438 | 0.34601 | -0.00000 | 0.00000 | Uiso | 1.00 |
| C6  | C | 0.45931 | 0.38170 | -0.00000 | 0.00000 | Uiso | 1.00 |
| C7  | C | 0.35533 | 0.44186 | -0.00000 | 0.00000 | Uiso | 1.00 |
| N8  | N | 0.37675 | 0.67562 | -0.00000 | 0.00000 | Uiso | 1.00 |
| C9  | C | 0.36808 | 0.71043 | -0.00000 | 0.00000 | Uiso | 1.00 |
| C10 | C | 0.35220 | 0.59416 | -0.00000 | 0.00000 | Uiso | 1.00 |
| C11 | C | 0.39679 | 0.79396 | -0.00000 | 0.00000 | Uiso | 1.00 |
| C12 | C | 0.45123 | 0.76816 | -0.00000 | 0.00000 | Uiso | 1.00 |
| C13 | C | 0.48673 | 0.81315 | -0.00000 | 0.00000 | Uiso | 1.00 |
| C14 | C | 0.43216 | 0.83880 | -0.00000 | 0.00000 | Uiso | 1.00 |
| C15 | C | 0.47753 | 0.84910 | -0.00000 | 0.00000 | Uiso | 1.00 |
| C16 | C | 0.75542 | 0.45703 | -0.00000 | 0.00000 | Uiso | 1.00 |
| C17 | C | 0.79242 | 0.41226 | -0.00000 | 0.00000 | Uiso | 1.00 |
| C18 | C | 0.83461 | 0.45182 | -0.00000 | 0.00000 | Uiso | 1.00 |
| C19 | C | 0.79766 | 0.49667 | -0.00000 | 0.00000 | Uiso | 1.00 |
| C20 | C | 0.83788 | 0.49476 | -0.00000 | 0.00000 | Uiso | 1.00 |
| N21 | N | 0.70520 | 0.33112 | -0.00000 | 0.00000 | Uiso | 1.00 |
| C22 | C | 0.70772 | 0.37217 | -0.00000 | 0.00000 | Uiso | 1.00 |
| C23 | C | 0.66199 | 0.24766 | -0.00000 | 0.00000 | Uiso | 1.00 |
| C24 | C | 0.51331 | 0.89765 | -0.00000 | 0.00000 | Uiso | 1.00 |
| C25 | C | 0.46186 | 0.34373 | -0.00000 | 0.00000 | Uiso | 1.00 |
| H26 | H | 0.30965 | 0.34285 | -0.00000 | 0.00000 | Uiso | 1.00 |
| H27 | H | 0.36486 | 0.31177 | -0.00000 | 0.00000 | Uiso | 1.00 |
| H28 | H | 0.48951 | 0.41455 | -0.00000 | 0.00000 | Uiso | 1.00 |
| H29 | H | 0.31912 | 0.42818 | -0.00000 | 0.00000 | Uiso | 1.00 |
| H30 | H | 0.36230 | 0.78755 | -0.00000 | 0.00000 | Uiso | 1.00 |
| H31 | H | 0.45945 | 0.74131 | -0.00000 | 0.00000 | Uiso | 1.00 |
| H32 | H | 0.52097 | 0.81915 | -0.00000 | 0.00000 | Uiso | 1.00 |
| H33 | H | 0.42391 | 0.86565 | -0.00000 | 0.00000 | Uiso | 1.00 |
| H34 | H | 0.72520 | 0.45991 | -0.00000 | 0.00000 | Uiso | 1.00 |
| H35 | H | 0.79134 | 0.37997 | -0.00000 | 0.00000 | Uiso | 1.00 |
| H36 | H | 0.86403 | 0.44781 | -0.00000 | 0.00000 | Uiso | 1.00 |
| H37 | H | 0.79889 | 0.52905 | -0.00000 | 0.00000 | Uiso | 1.00 |
| H38 | H | 0.50168 | 0.92201 | -0.00000 | 0.00000 | Uiso | 1.00 |
| H39 | H | 0.43082 | 0.31132 | -0.00000 | 0.00000 | Uiso | 1.00 |
| C40 | C | 0.74968 | 0.04956 | 0.50000  | 0.00000 | Uiso | 1.00 |
| N41 | N | 0.74952 | 0.08898 | 0.50000  | 0.00000 | Uiso | 1.00 |
| C42 | C | 0.70529 | 0.07653 | 0.50000  | 0.00000 | Uiso | 1.00 |
| C43 | C | 0.67935 | 0.02997 | 0.50000  | 0.00000 | Uiso | 1.00 |
| N44 | N | 0.70750 | 0.01302 | 0.50000  | 0.00000 | Uiso | 1.00 |
| C45 | C | 0.79252 | 0.04875 | 0.50000  | 0.00000 | Uiso | 1.00 |
| C46 | C | 0.68839 | 0.10874 | 0.50000  | 0.00000 | Uiso | 1.00 |
| N47 | N | 0.71006 | 0.34229 | 0.50000  | 0.00000 | Uiso | 1.00 |
| C48 | C | 0.70138 | 0.37705 | 0.50000  | 0.00000 | Uiso | 1.00 |

|     |   |         |          |         |         |      |      |
|-----|---|---------|----------|---------|---------|------|------|
| C49 | C | 0.68550 | 0.26094  | 0.50000 | 0.00000 | Uiso | 1.00 |
| C50 | C | 0.72999 | 0.46045  | 0.50000 | 0.00000 | Uiso | 1.00 |
| C51 | C | 0.78441 | 0.43460  | 0.50000 | 0.00000 | Uiso | 1.00 |
| C52 | C | 0.81991 | 0.47951  | 0.50000 | 0.00000 | Uiso | 1.00 |
| C53 | C | 0.76538 | 0.50524  | 0.50000 | 0.00000 | Uiso | 1.00 |
| C54 | C | 0.81072 | 0.51545  | 0.50000 | 0.00000 | Uiso | 1.00 |
| C55 | C | 1.08905 | 0.12379  | 0.50000 | 0.00000 | Uiso | 1.00 |
| C56 | C | 1.12598 | 0.07897  | 0.50000 | 0.00000 | Uiso | 1.00 |
| C57 | C | 1.16823 | 0.11851  | 0.50000 | 0.00000 | Uiso | 1.00 |
| C58 | C | 1.13136 | 0.16344  | 0.50000 | 0.00000 | Uiso | 1.00 |
| C59 | C | 1.17157 | 0.16149  | 0.50000 | 0.00000 | Uiso | 1.00 |
| N60 | N | 1.03851 | -0.00228 | 0.50000 | 0.00000 | Uiso | 1.00 |
| C61 | C | 1.04112 | 0.03884  | 0.50000 | 0.00000 | Uiso | 1.00 |
| C62 | C | 0.99518 | -0.08586 | 0.50000 | 0.00000 | Uiso | 1.00 |
| C63 | C | 0.84648 | 0.56392  | 0.50000 | 0.00000 | Uiso | 1.00 |
| C64 | C | 0.79510 | 0.01077  | 0.50000 | 0.00000 | Uiso | 1.00 |
| H65 | H | 0.64274 | 0.00984  | 0.50000 | 0.00000 | Uiso | 1.00 |
| H66 | H | 0.69799 | -0.02121 | 0.50000 | 0.00000 | Uiso | 1.00 |
| H67 | H | 0.82272 | 0.08159  | 0.50000 | 0.00000 | Uiso | 1.00 |
| H68 | H | 0.65217 | 0.09506  | 0.50000 | 0.00000 | Uiso | 1.00 |
| H69 | H | 0.69552 | 0.45404  | 0.50000 | 0.00000 | Uiso | 1.00 |
| H70 | H | 0.79259 | 0.40772  | 0.50000 | 0.00000 | Uiso | 1.00 |
| H71 | H | 0.85413 | 0.48547  | 0.50000 | 0.00000 | Uiso | 1.00 |
| H72 | H | 0.75717 | 0.53212  | 0.50000 | 0.00000 | Uiso | 1.00 |
| H73 | H | 1.05886 | 0.12673  | 0.50000 | 0.00000 | Uiso | 1.00 |
| H74 | H | 1.12486 | 0.04665  | 0.50000 | 0.00000 | Uiso | 1.00 |
| H75 | H | 1.19765 | 0.11449  | 0.50000 | 0.00000 | Uiso | 1.00 |
| H76 | H | 1.13263 | 0.19583  | 0.50000 | 0.00000 | Uiso | 1.00 |
| H77 | H | 0.83487 | 0.58829  | 0.50000 | 0.00000 | Uiso | 1.00 |
| H78 | H | 0.76405 | -0.02162 | 0.50000 | 0.00000 | Uiso | 1.00 |

**Table S3.** A comparison of U uptake capacity among established adsorbents/photocatalysts and our case.

| Adsorbents               | U uptake capacity (mg/g) | Reference                           |
|--------------------------|--------------------------|-------------------------------------|
| <b>TI-COF</b>            | <b>902</b>               | <b>Our case</b>                     |
| i-MZIF90(50)             | 1.3 g/g                  | Energy Environ. Sci., 2022,15, 3462 |
| USC-CP-1                 | 562                      | Angew. Chem. Int. Ed. 2019,58,52    |
| POP-pNH <sub>2</sub> -AO | 580                      | Nat. Commun. 2018, 9,1644           |
| MUU <sub>re</sub>        | 475                      | Angew. Chem. Int. Ed. 2022,61,82    |
| COF-TpDb-AO              | 408                      | Adv. Mater. 2018, 1705479           |
| SCU-19                   | 557                      | Angew. Chem. Int. Ed. 2019,58,45    |
| SZ-2/SZ-3                | 58                       | Nat. Commun. 2017, 8, 15369         |
| MISS-PAF-1               | 79.8                     | ACS Cent. Sci. 2019, 5,1432         |
| PIDO NF                  | 860                      | Adv. Energy Mater. 2018,8,1802607   |
| COF-TpAb-AO              | 127                      | Adv. Mater. 2018, 30, 1705479       |
| MIPAF-11c                | 14.5                     | Adv. Mater. 2018, 30, 1706507       |
| NDA-TN-AO                | 600                      | Angew. Chem. Int. Ed. 2020,59,40    |

**Table S4.** A comparison of U adsorption kinetics among established photocatalysts and our case.

| Adsorbents        | Adsorption equilibrium time (min) | Reference                           |
|-------------------|-----------------------------------|-------------------------------------|
| <b>TI-COF</b>     | <b>40</b>                         | <b>Our case</b>                     |
| i-MZIF90(50)      | 120                               | Energy Environ. Sci., 2022,15, 3462 |
| SCU-19            | 500                               | Angew. Chem. Int. Ed. 2019,58,45    |
| COF-4             | 200                               | Nat. Commun. 2023, 14,1106          |
| Tp-DBD            | 300                               | Small 2021, 17, 2006882             |
| WO <sub>3-x</sub> | 120                               | Appl. Catal. B. 2023,324,122202     |
| BP@CNF-MOF        | 600                               | Adv. Fun. Mater. 2021, 31, 2100106  |
| NDA-TN-AO         | 900                               | Angew. Chem. Int. Ed. 2020,59,40    |

**Table S5.** A comparison in U uptake capacity from natural seawater among established adsorbents and our case. All the photocatalysis was performed under simulated sunlight.

| Materials     | Adsorbent dosage   | Time (d) | Capacity for U (mg/g/day) | References                             |
|---------------|--------------------|----------|---------------------------|----------------------------------------|
| <b>TI-COF</b> | <b>5 mg sample</b> | <b>1</b> | <b>8.8</b>                | <b>This work</b>                       |
| i-MZIF90(50)  | 10 mg sample       | 25       | 1.1                       | Energy Environ. Sci., 2022,15, 3462    |
| COF 4P        | 10 mg sample       | 3        | 8.02                      | Angew. Chem. Int. Ed. 2023, e202303129 |
| COF-HHTF-AO   | 5 mg sample        | 25       | 0.21                      | Sci. Bull. 2021, 66, 1994              |
| Tp-DBD        | 5 mg sample        | 8        | 1.28                      | Small 2021, 17, 2006882                |
| COF 4-Pd-AO   | 10 mg sample       | 3        | 4.62                      | CCS Chem. 2022, 4, 2294                |
| COF-R5        | 10 mg sample       | 15       | 0.75                      | Cell Rep. Phys. Sci. 2023, 4, 101220   |

|                          |               |     |      |                                               |
|--------------------------|---------------|-----|------|-----------------------------------------------|
| NDA-TN-AO                | 5 mg sample   | 27  | 0.22 | Angew. Chem. Int. Ed. 2020, 59, 17684         |
| COF 2-Ru-AO              | 10 mg sample  | 3   | 2.45 | JACS. Au. 2023, 3, 239                        |
| COF-4                    | 9 mg sample   | 56  | 6.84 | Nat. Commun. 2023, 14, 1106                   |
| UiO-66-3C4N              | 20 mg sample  | 28  | 0.24 | Angew. Chem. Int. Ed. 2020, 59, 4262          |
| UiO-66-A0                | 1 mg sample   | 3   | 0.89 | ACS. Appl. Mater. Interfaces. 2017, 9, 32446  |
| Anti-UiO-66              | 5 mg sample   | 30  | 0.15 | Adv. Sci. 2019, 6, 1900002                    |
| MIL-101-0A               | 100 mg sample | 5   | 0.92 | Micropor. Mesopor. Mater. 2019, 288, 109567   |
| PPA@MISS-PAF-1           |               |     | 0.38 | Chem. 2020, 6, 1683                           |
| BP-PAO                   | 10 mg sample  | 56  | 0.21 | Angew. Chem. Int. Ed. 2019, 59, 1220          |
| AO-PIM-1                 | 10 mg sample  | 28  | 0.32 | Nat. Sustain. 2022, 5, 71                     |
| POP1-AO                  | 2.5 mg sample | 56  | 0.15 | ACS Cent. Sci. 2021, 7, 1650                  |
| PAF-CS                   | 5 mg sample   | 21  | 0.28 | Chem. Sci. 2020, 11, 4747                     |
| MISS-PAF-1               | 5 mg sample   | 56  | 0.10 | ACS Cent. Sci. 2019, 5, 1432                  |
| POP-oNH <sub>2</sub> -AO | 5 mg sample   | 56  | 0.07 | Nat. Commun. 2018, 9, 1644                    |
| P(2DVB-VBC)-2PAN         | 10 mg sample  | 27  | 0.07 | Angew. Chem. Int. Ed. 2013, 52, 13458         |
| AO-HNTs                  | 10 mg sample  | 30  | 0.30 | Angew. Chem. Int. Ed. 2019, 58, 14979         |
| MIGPAF-13                | 4 mg sample   | 28  | 0.28 | J. Am. Chem. Soc. 2021, 143, 14523            |
| Fe-Nx-C-R                | 6 mg sample   | 1   | 1.20 | Adv. Mater. 2021, 33, 2106621                 |
| Cp-1:12                  | 10 mg sample  | 28  | 0.02 | Sci. China Chem. 2013, 56, 1510               |
| DSUP                     | 10 mg sample  | 3   | 5.82 | Angew. Chem. Int. Ed. 2020, 59, 15997         |
| SSUP                     | 10 mg sample  | 3.5 | 3.52 | Angew. Chem. Int. Ed. 2019, 58, 11785         |
| H-ABP                    | 10 mg sample  | 90  | 0.13 | Energy Environ. Sci. 2019, 12, 1979           |
| SMON-PAO                 | 10 mg sample  | 56  | 0.17 | Adv. Funct. Mater. 2019, 29, 1805380          |
| Zn <sup>2+</sup> -PAO    | 36 mg sample  | 28  | 0.33 | Adv. Mater. 2020, 32, 1906615                 |
| PPH-OP                   | 10 mg sample  | 21  | 0.34 | Nat. Sustain. 2021, 4, 708                    |
| DNA-UEH                  | 10 mg sample  | 6   | 1.01 | Nat. Commun. 2020, 11, 5708                   |
| MS@PIDO/Alg sponge       |               | 56  | 0.10 | Adv. Funct. Mater. 2019, 29, 1901009          |
| AUPM membrane            | 36 mg sample  | 25  | 0.35 | ACS. Appl. Mater. Interfaces. 2021, 13, 21272 |
